# Supplementary material for: Korean Red Ginseng extract induces angiogenesis through activation of glucocorticoid receptor
Source: PubMed Central journal article supplement — J Ginseng Res. 2016 Sep 8;41(4):477–86. doi: 10.1016/j.jgr.2016.08.011 (PMC5628332; doi:10.1016/j.jgr.2016.08.011), 2016-09-08
Supplement: mmc1.pdf [file mmc1.pdf]

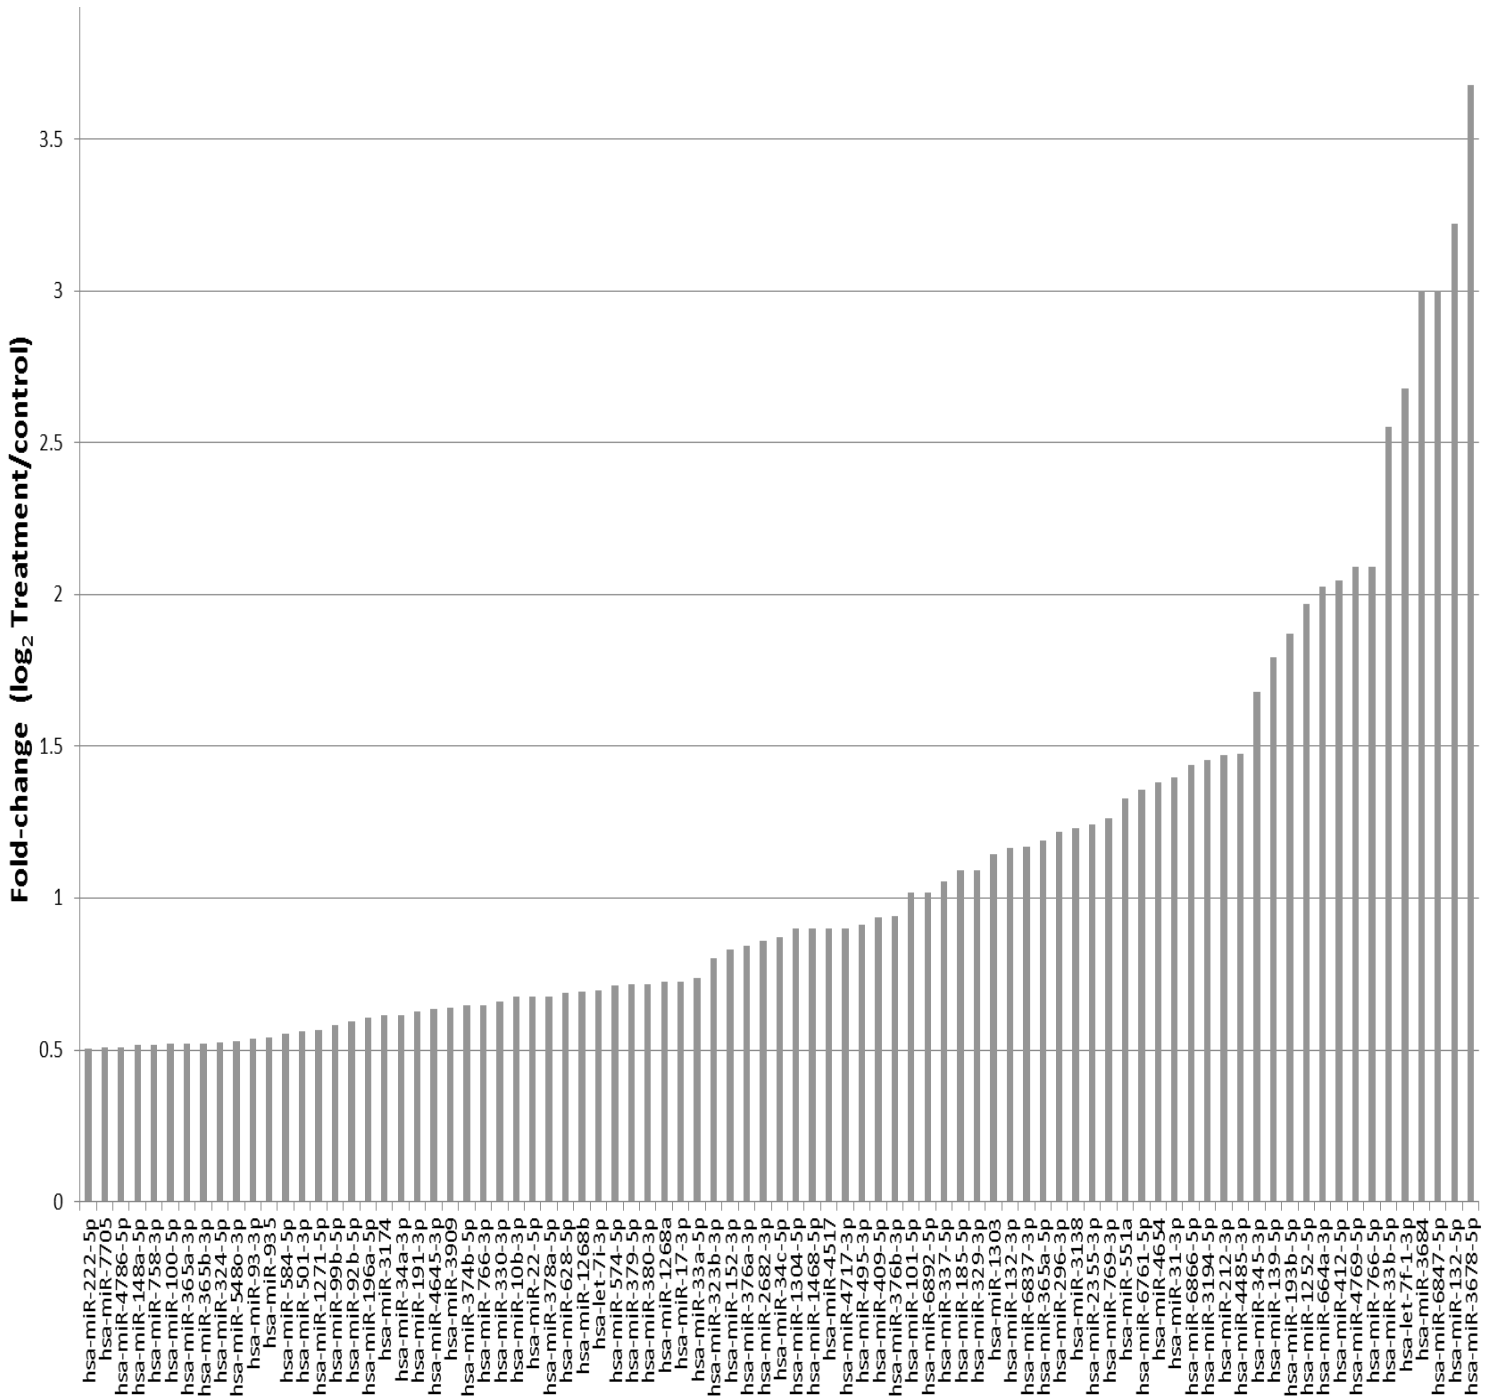

**Supplementary Fig 1A. Upregulation of KGE on miRNA expressions by miRNA sequencing.** HUVECs were incubated with KGE (500 µg/ml) for 24 h. The graph indicated the quantification of known miRNA expression for fold change  $\leq -0.5$  or fold change  $\geq 0.5$ . Values are presented as the means  $\pm$  SD of three independent experiments. All data were analysed by ANOVA with multiple *post hoc* testing.

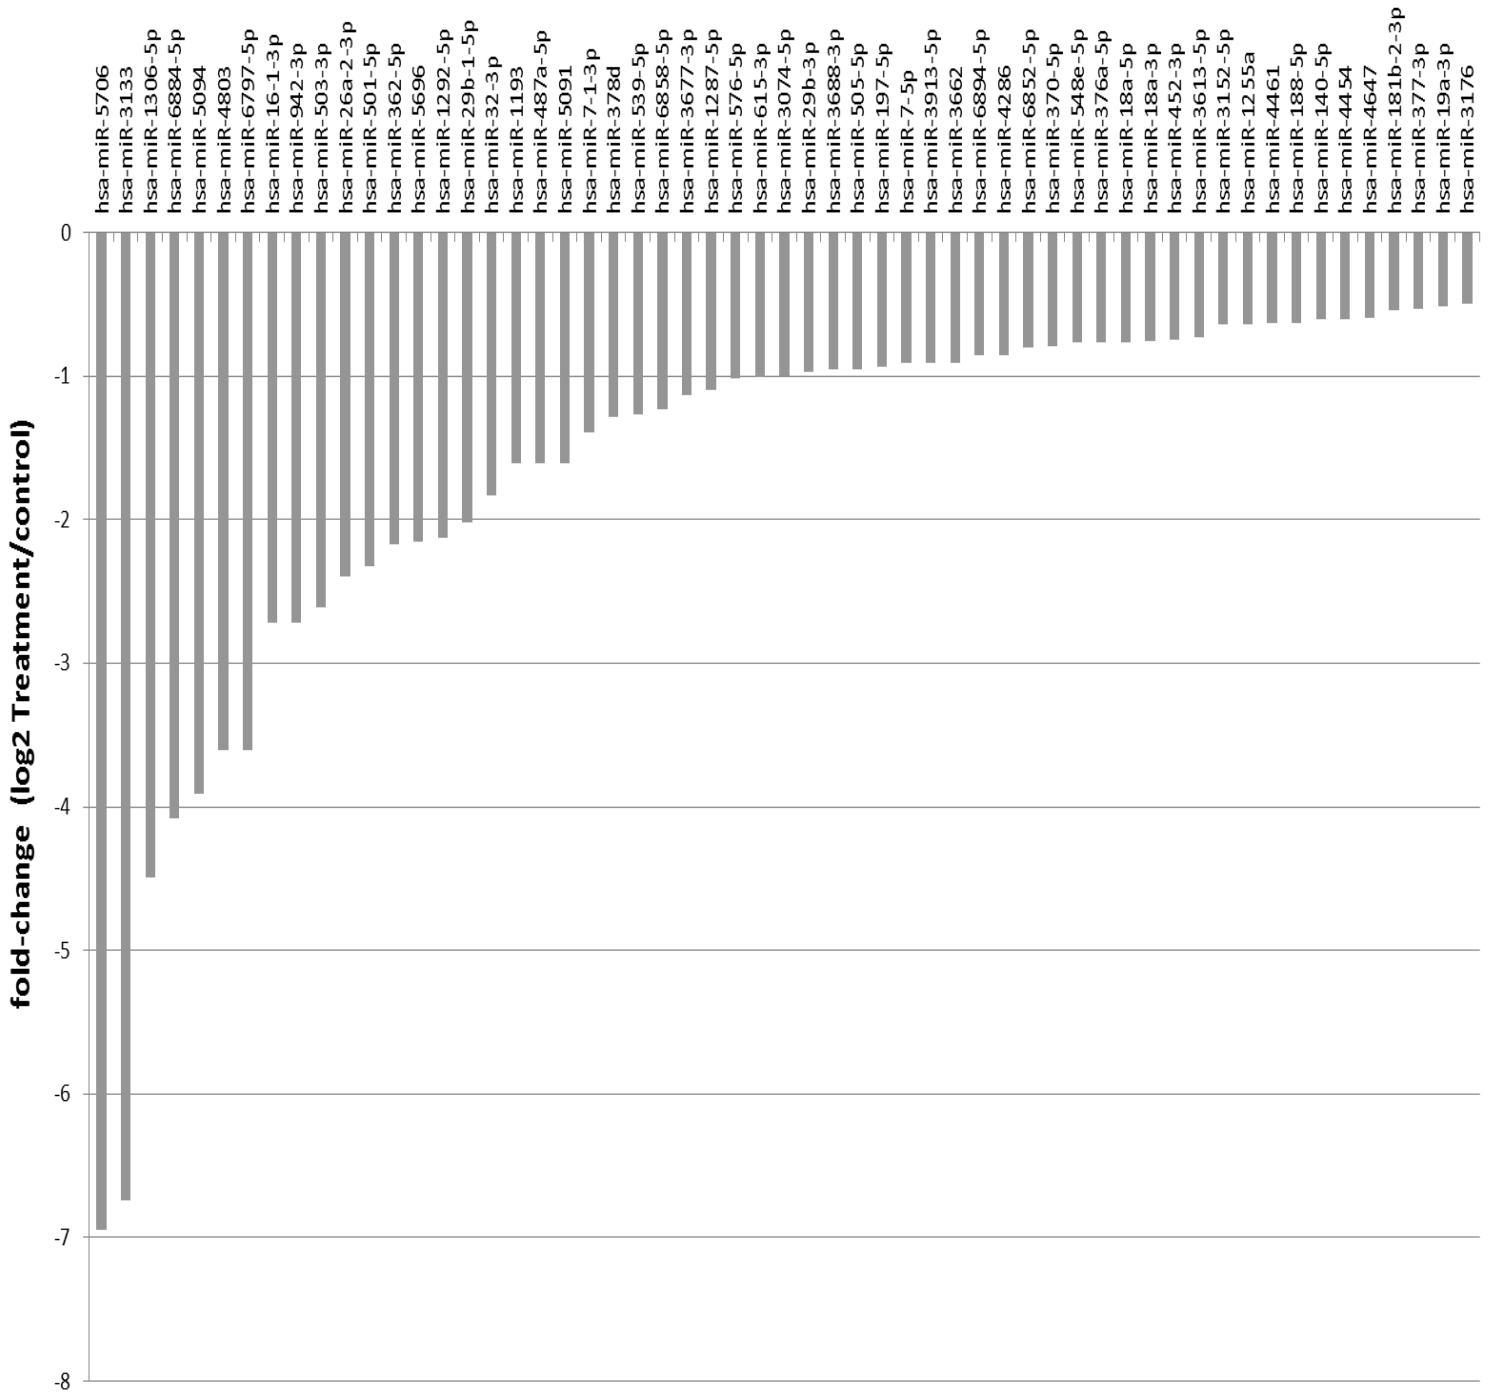

**Supplementary Fig 1B. Downregulation of KGE on miRNA expressions by miRNA sequencing.** HUVECs were incubated with KGE (500 µg/ml) for 24 h. The graph indicated the quantification of known miRNA expression for fold change  $\leq -0.5$  or fold change  $\geq 0.5$ . Values are presented as the means  $\pm$  SD of three independent experiments. All data were analysed by ANOVA with multiple *post hoc* testing.

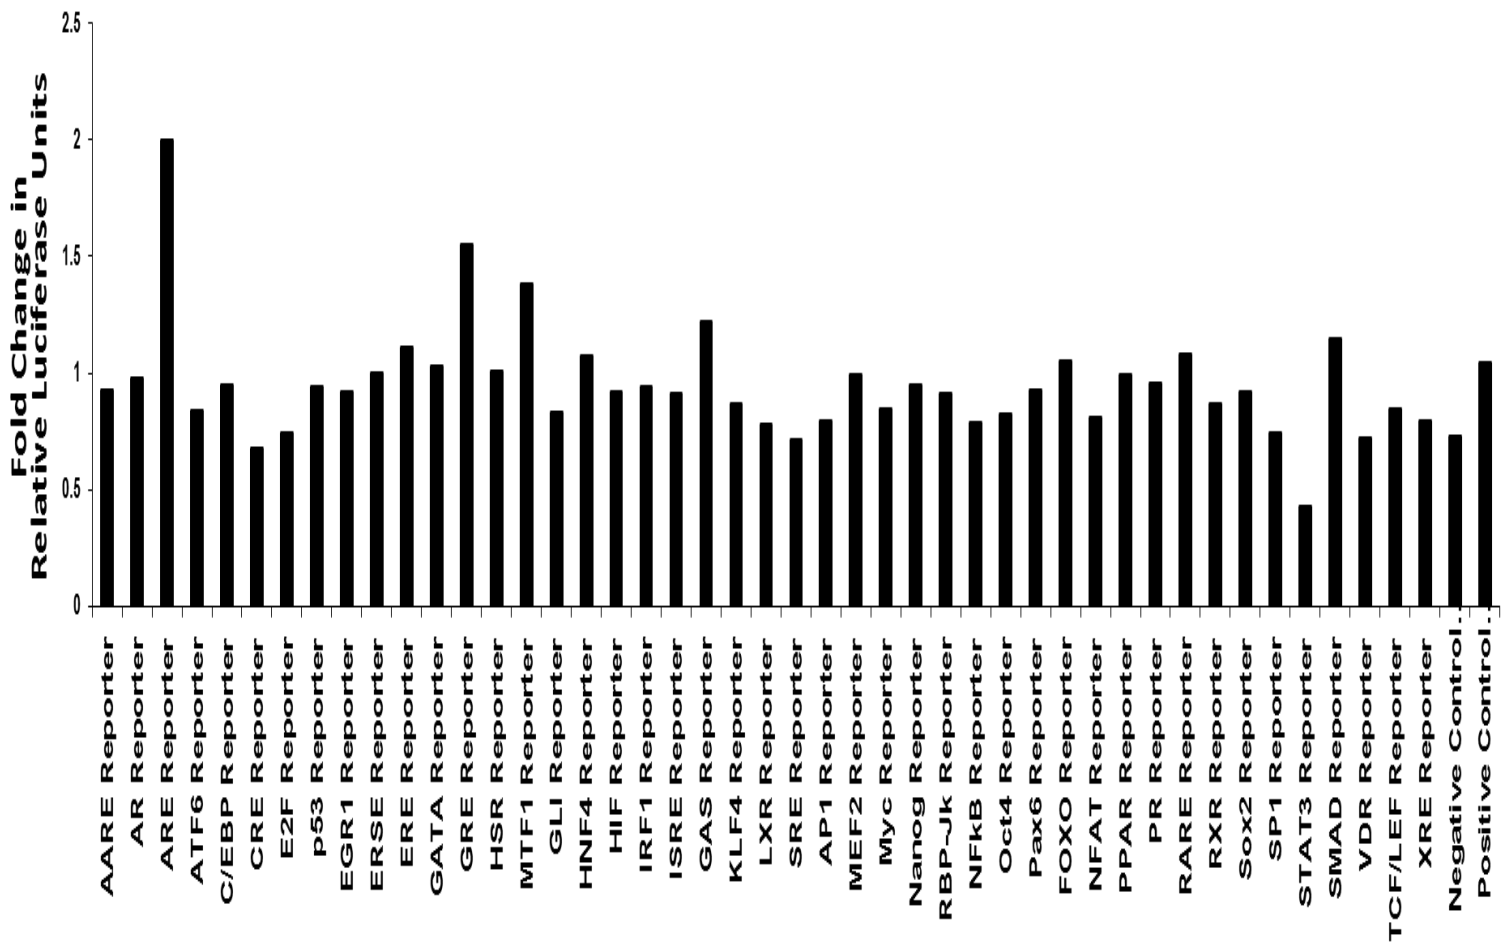

**Supplementary Fig 2. Effect of KGE on signalling pathway.** COS-7 cells were incubated with KGE (500  $\mu\text{g/ml}$ ) for 24 h. The graph indicated the quantification of the reporter expressions, using Renilla reporter for internal normalization. Values are presented as the means  $\pm$  SD of three independent experiments. All data were analysed by ANOVA with multiple *post hoc* testing.
